# Supplementary material
Source: PubMed Central journal article supplement (PMC1567677)

# Whole embryos

Phospho-  
(Ser/Thr)  
AKT

Phospho-  
(Ser/Thr)  
PKA

Phospho-  
(Ser/Thr)  
ATM/ATR

Phospho-  
(Ser)CDK

Phospho-  
(Ser) PKC

XSCP2

- +

- +

- +

- +

- +

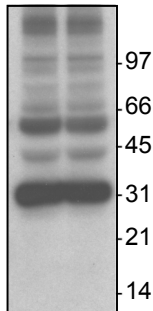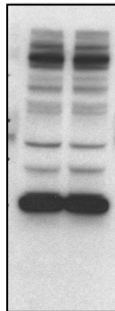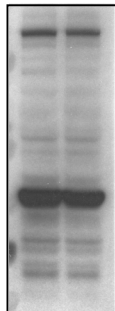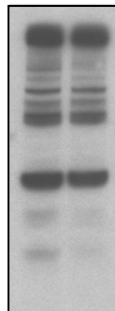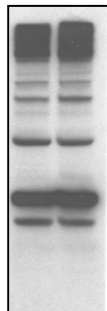

Supplement: pnas_0605133103_1.pdf [file pnas_0605133103_1.pdf]
