# Supplementary material
Source: PubMed Central journal article supplement (PMC1567677)

**A** Staurosporine - - + +  
 BMP4 (1hr) - + + +

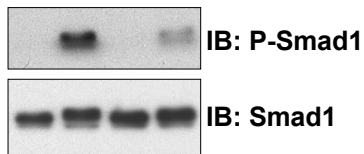

**B**

|                              |       |          |     |   |   |   |             |   |     |   |   |   |
|------------------------------|-------|----------|-----|---|---|---|-------------|---|-----|---|---|---|
|                              | siRNA | ← iGFP → |     |   |   |   | ← iSCP1/2 → |   |     |   |   |   |
| Staurosporine                | -     | -        | +   | + | + | + | -           | - | +   | + | + | + |
| BMP4 (1hr)                   | -     | +        | +   | + | + | + | -           | + | +   | + | + | + |
| Time after BMP4 removal (hr) | -     | 0        | 0.5 | 1 | 2 | 4 | -           | 0 | 0.5 | 1 | 2 | 4 |

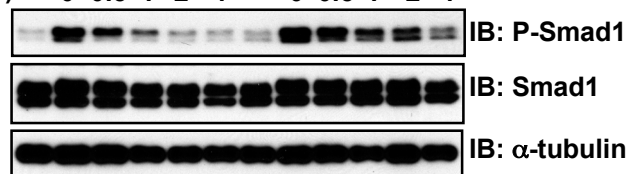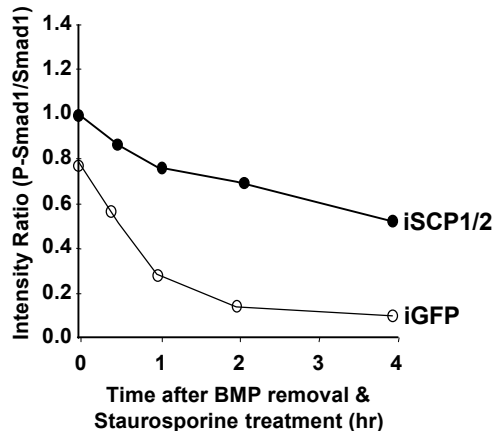

Supplement: pnas_0605133103_2.pdf [file pnas_0605133103_2.pdf]
